# Supplementary material
Source: PubMed Central journal article supplement (PMC4138547)
Supplement: NIHMS551337-supplement-2.pdf [file NIHMS551337-supplement-2.pdf]

## Domestic Robots for Older Adults: Attitudes, Preferences, and Potential

International Journal of Social Robotics

Cory-Ann Smarr<sup>1</sup>, Tracy L. Mitzner<sup>1</sup>, Jenay M. Beer<sup>1</sup>, Akanksha Prakash<sup>1</sup>, Tiffany L. Chen<sup>2</sup>, Charles C. Kemp<sup>2</sup>, & Wendy A. Rogers<sup>1</sup>

<sup>1</sup> *School of Psychology, Georgia Institute of Technology, 654 Cherry Street NW Atlanta, GA 30332-0170*

<sup>2</sup> *Department of Biomedical Engineering, Georgia Institute of Technology, 828 West Peachtree Street NW Atlanta, GA 30308*

[cory-ann.smarr@gatech.edu](mailto:cory-ann.smarr@gatech.edu)

Online Resource 2: The 25 action words given to older adults during the group interview to facilitate discussion of what tasks they would want robot assistance with in their homes.

Carry  
Entertain  
Find  
Interact/Converse  
Monitoring (home, health)  
Notify/Alert/Warn  
Open  
Organize  
Pick up/Lift  
Place  
Play  
Prepare  
Push/Pull  
Reach  
Remind  
Repair  
Show/Demonstrate  
Teach/Inform
